# Supplementary material for: Inhibition of TOPORS ubiquitin ligase augments the efficacy of DNA hypomethylating agents through DNMT1 stabilization
Source: PubMed Central journal article supplement (PMC11358161; doi:10.1038/s41467-024-50498-4), 2024-08-28
Supplement: 41467_2024_50498_MOESM12_ESM.pdf [file 41467_2024_50498_MOESM12_ESM.pdf]

## Reporting Summary

Nature Portfolio wishes to improve the reproducibility of the work that we publish. This form provides structure for consistency and transparency in reporting. For further information on Nature Portfolio policies, see our [Editorial Policies](#) and the [Editorial Policy Checklist](#).

### Statistics

For all statistical analyses, confirm that the following items are present in the figure legend, table legend, main text, or Methods section.

- | n/a                                 | Confirmed                                                                                                                                                                                                                                                                                      |
|-------------------------------------|------------------------------------------------------------------------------------------------------------------------------------------------------------------------------------------------------------------------------------------------------------------------------------------------|
| <input type="checkbox"/>            | <input checked="" type="checkbox"/> The exact sample size ( $n$ ) for each experimental group/condition, given as a discrete number and unit of measurement                                                                                                                                    |
| <input type="checkbox"/>            | <input checked="" type="checkbox"/> A statement on whether measurements were taken from distinct samples or whether the same sample was measured repeatedly                                                                                                                                    |
| <input type="checkbox"/>            | <input checked="" type="checkbox"/> The statistical test(s) used AND whether they are one- or two-sided<br><i>Only common tests should be described solely by name; describe more complex techniques in the Methods section.</i>                                                               |
| <input checked="" type="checkbox"/> | <input type="checkbox"/> A description of all covariates tested                                                                                                                                                                                                                                |
| <input type="checkbox"/>            | <input checked="" type="checkbox"/> A description of any assumptions or corrections, such as tests of normality and adjustment for multiple comparisons                                                                                                                                        |
| <input type="checkbox"/>            | <input checked="" type="checkbox"/> A full description of the statistical parameters including central tendency (e.g. means) or other basic estimates (e.g. regression coefficient) AND variation (e.g. standard deviation) or associated estimates of uncertainty (e.g. confidence intervals) |
| <input type="checkbox"/>            | <input checked="" type="checkbox"/> For null hypothesis testing, the test statistic (e.g. $F$ , $t$ , $r$ ) with confidence intervals, effect sizes, degrees of freedom and $P$ value noted<br><i>Give <math>P</math> values as exact values whenever suitable.</i>                            |
| <input checked="" type="checkbox"/> | <input type="checkbox"/> For Bayesian analysis, information on the choice of priors and Markov chain Monte Carlo settings                                                                                                                                                                      |
| <input checked="" type="checkbox"/> | <input type="checkbox"/> For hierarchical and complex designs, identification of the appropriate level for tests and full reporting of outcomes                                                                                                                                                |
| <input checked="" type="checkbox"/> | <input type="checkbox"/> Estimates of effect sizes (e.g. Cohen's $d$ , Pearson's $r$ ), indicating how they were calculated                                                                                                                                                                    |

*Our web collection on [statistics for biologists](#) contains articles on many of the points above.*

### Software and code

Policy information about [availability of computer code](#)

Data collection

Detailed information is described in the method section. Briefly, HiSeq 2500 (Illumina) was used for CRISPR/Cas9 screening and RNA sequence. FACS Celesta (BD) and FACS Aria III (BD) were used for cell analysis and sorting. Image lab (BioLad) was used for western blot quantification. Orbitrap Eclipse Tribrid mass spectrometer with a FAIMS Pro interface (Thermo Fisher Scientific) was used for mass spectrometry.

Data analysis

Softwares used in this study were described in the method section. Briefly, Prism GraphPad 9 (GraphPad) was used to analyze the data and create the figure. Flow jo 10.1 (FlowJo, LCC) was used to analyze flow cytometry plots. RNA sequence data was analyzed with iDEP95 (Ge et al., 2018). Proteome Discoverer 2.5 (Thermo Fisher Scientific) was used to analyze the mass spectrometry data. Gene set enrichment analysis was performed with GSEA 4.3.0 (Broad Institute). CRISPR/Cas9 screening results were analyzed using MAGeCK (Liu et al., 2014). SUMO-interaction motifs was predicted with GPS-SUMO (Zhao et al., 2014).

For manuscripts utilizing custom algorithms or software that are central to the research but not yet described in published literature, software must be made available to editors and reviewers. We strongly encourage code deposition in a community repository (e.g. GitHub). See the Nature Portfolio [guidelines for submitting code & software](#) for further information.

## Data

Policy information about [availability of data](#)

All manuscripts must include a [data availability statement](#). This statement should provide the following information, where applicable:

- Accession codes, unique identifiers, or web links for publicly available datasets
- A description of any restrictions on data availability
- For clinical datasets or third party data, please ensure that the statement adheres to our [policy](#)

The RNA sequence data were deposited to the DNA Data Bank of Japan (accession number: DRA015263). The mass spectrometry proteomics data were deposited to the ProteomeXchange Consortium via the jPOST repository with the dataset identifier PXD044347 and 048275.

## Research involving human participants, their data, or biological material

Policy information about studies with [human participants or human data](#). See also policy information about [sex, gender \(identity/presentation\), and sexual orientation](#) and [race, ethnicity and racism](#).

|                                                                    |                                                                                                                                                                                                                            |
|--------------------------------------------------------------------|----------------------------------------------------------------------------------------------------------------------------------------------------------------------------------------------------------------------------|
| Reporting on sex and gender                                        | Sex and gender of participants was determined based on self-report but was not considered in this study.                                                                                                                   |
| Reporting on race, ethnicity, or other socially relevant groupings | Only Japanese samples were used.                                                                                                                                                                                           |
| Population characteristics                                         | MDS and AML samples with and without treatment with Azacitidine                                                                                                                                                            |
| Recruitment                                                        | MDS and AML patients were recruited without any bias. Informed consent was obtained by participants.                                                                                                                       |
| Ethics oversight                                                   | The institutional ethical committee at Kyoto University (Approval #G-608) and Tokyo Metropolitan Cancer and Infectious Diseases Center, Komagome Hospital (Approval #2203). informed consent was obtained by participants. |

Note that full information on the approval of the study protocol must also be provided in the manuscript.

## Field-specific reporting

Please select the one below that is the best fit for your research. If you are not sure, read the appropriate sections before making your selection.

- Life sciences       Behavioural & social sciences       Ecological, evolutionary & environmental sciences

For a reference copy of the document with all sections, see [nature.com/documents/nr-reporting-summary-flat.pdf](https://www.nature.com/documents/nr-reporting-summary-flat.pdf)

## Life sciences study design

All studies must disclose on these points even when the disclosure is negative.

|                 |                                                                                                                                                                                                                                  |
|-----------------|----------------------------------------------------------------------------------------------------------------------------------------------------------------------------------------------------------------------------------|
| Sample size     | Sample size was determined based on previous paper (Joung et al., Nat protocol 2017).                                                                                                                                            |
| Data exclusions | All sequence data were included in this analysis.                                                                                                                                                                                |
| Replication     | The CRISPR screening data were reproducible in screening at different drug concentrations using two different cell lines (supplementary figure 3. The results was validated and also in individually designed sgRNAs (figure 2). |
| Randomization   | In xenograft experiments, recipient mice engrafted by human leukemic cells were randomized based on the leukemic cell burden in the peripheral blood.                                                                            |
| Blinding        | The researcher was not blinded. The subjectivity of the author would not have affected the analysis in this study.                                                                                                               |

## Reporting for specific materials, systems and methods

We require information from authors about some types of materials, experimental systems and methods used in many studies. Here, indicate whether each material, system or method listed is relevant to your study. If you are not sure if a list item applies to your research, read the appropriate section before selecting a response.

## Materials &amp; experimental systems

|                                     |                                                                 |
|-------------------------------------|-----------------------------------------------------------------|
| n/a                                 | Involved in the study                                           |
| <input type="checkbox"/>            | <input checked="" type="checkbox"/> Antibodies                  |
| <input type="checkbox"/>            | <input checked="" type="checkbox"/> Eukaryotic cell lines       |
| <input checked="" type="checkbox"/> | <input type="checkbox"/> Palaeontology and archaeology          |
| <input type="checkbox"/>            | <input checked="" type="checkbox"/> Animals and other organisms |
| <input type="checkbox"/>            | <input checked="" type="checkbox"/> Clinical data               |
| <input checked="" type="checkbox"/> | <input type="checkbox"/> Dual use research of concern           |
| <input checked="" type="checkbox"/> | <input type="checkbox"/> Plants                                 |

## Methods

|                                     |                                                    |
|-------------------------------------|----------------------------------------------------|
| n/a                                 | Involved in the study                              |
| <input checked="" type="checkbox"/> | <input type="checkbox"/> ChIP-seq                  |
| <input type="checkbox"/>            | <input checked="" type="checkbox"/> Flow cytometry |
| <input checked="" type="checkbox"/> | <input type="checkbox"/> MRI-based neuroimaging    |

## Antibodies

## Antibodies used

PE Anti-human CD45 (clone HI30) BioLegend 304039; RRID: AB\_2562057  
 e450 Anti-mouse Ly-6G/Ly-6C (clone RB6-8C5) Invitrogen 48-5931-82; RRID: AB\_1548788  
 APC Anti-mouse CD11b (clone M1/70) BioLegend 101212; RRID: AB\_312795  
 PE/Cy5 Anti-mouse Ter119 (clone TER-119) Invitrogen 15-5921-82; RRID: AB\_468810  
 AF700 Anti-mouse B220 (clone RA3-6B2) BioLegend 103232; RRID: AB\_493717  
 PE/Cy7 Anti-mouse CD3e (clone 145-2C11) BioLegend 100320; RRID: AB\_312685  
 FITC Anti-mouse CD45.2 (clone 104) BioLegend 109806; RRID: AB\_313443  
 APC/Cy7 Anti-mouse CD45.1 (clone A20) BioLegend 110716; RRID: AB\_313505  
 PE/Cy5 Anti-mouse CD3e (clone 145-2C11) Invitrogen 15-0031-83; RRID: AB\_468690  
 PE/Cy5 Anti-mouse CD4 (clone GK1.5) BioLegend 100409; RRID: AB\_312694  
 PE/Cy5 Anti-mouse CD5 (clone 53-7.3) BioLegend 100610; RRID: AB\_312739  
 PE/Cy5 Anti-mouse CD8a (clone 53-6.7) BioLegend 100710; RRID: AB\_312749  
 PE/Cy5 Anti-mouse B220 (clone RA3-6B2) BioLegend 103209; RRID: AB\_312994  
 PE/Cy5 Anti-mouse CD11b (clone M1-70) BioLegend 101210; RRID: AB\_312793  
 PE/Cy5 Anti-mouse Ly-6G/Ly-6C (clone RB6-8C5) BioLegend 108410; RRID: AB\_313375  
 APC Anti-mouse cKit (CD117) (clone 2B8) BioLegend 105812; RRID: AB\_313221  
 PE/Cy7 Anti-mouse Ly-6A/E (Sca-1) (clone D7) BioLegend 108114; RRID: AB\_493596  
 FITC Anti-mouse CD34 (clone RAM 34) Invitrogen 11-0341-85; RRID: AB\_465021  
 e450 Anti-mouse CD34 (clone RAM34) Invitrogen 48-0341-82; RRID: AB\_2043837  
 BV510 Anti-mouse CD16/32 (FcγRIII/II) (clone 93) BioLegend 101333; RRID: AB\_2563692  
 APC Annexin V BD Biosciences 550475; RRID: AB\_2868885  
 Anti-B-actin Cell Signaling Technology 4967; RRID: AB\_330288  
 Anti-TOPORS Bethyl Laboratories A302-179A; RRID: AB\_1659846  
 Anti-DNMT1 (D63A6) Cell Signaling Technology 5032; RRID: AB\_10548197  
 Anti-UHRF1 (clone 28) BD Biosciences 612264; RRID: AB\_399581  
 Anti-SUMO1 Cell Signaling Technology 4930; RRID: AB\_10698887  
 Anti-SUMO2/3 Abcam ab3742; RRID: AB\_304041  
 Anti-Ubiquitin (P4D1) Santa Cruz Biotechnology sc-8017; RRID: AB\_628423  
 Anti-Rabbit IgG, HRP-Linked Cytiva NA934  
 Anti-Mouse IgG, HRP-Linked Cytiva NA933

## Validation

Combination of these antibodies were already utilized by many published articles.  
 Nat Commun 12(1):3568, 2021.  
 J Exp Med 218(3):e20192283, 2021.  
 Leukemia 35:1156-1165, 2021.  
 Blood 128(5):638-649, 2016.  
 Exp Hematol 44:282-296, 2016.  
 Blood 126:1172-1183, 2015  
 All antibodies are validated by company.

## Eukaryotic cell lines

Policy information about [cell lines and Sex and Gender in Research](#)

## Cell line source(s)

MOLM-13 DSMZ ACC 544  
 MDS-L (Gift from Kaoru Tohyama) PMID: 29955132  
 SKK-1 (Gift from Hiroshi Matsuoka) PMID: 15996938  
 SKM-1 DSMZ ACC 547  
 Human CB-derived MLL-AF9 leukemic cells (Gift from Susumu Goyama) PMID: 36453131

## Authentication

None of these cells used in this study were authenticated.

|                                                                      |                                                                |
|----------------------------------------------------------------------|----------------------------------------------------------------|
| Mycoplasma contamination                                             | These cell lines were not tested for Mycoplasma contamination. |
| Commonly misidentified lines<br>(See <a href="#">ICLAC</a> register) | N/A                                                            |

## Animals and other research organisms

Policy information about [studies involving animals](#); [ARRIVE guidelines](#) recommended for reporting animal research, and [Sex and Gender in Research](#)

|                         |                                                                                                                                                                                                                                                                                                                                                                                                                                                                                                                                                                                                                                                                                                                                                                                                                                                                                   |
|-------------------------|-----------------------------------------------------------------------------------------------------------------------------------------------------------------------------------------------------------------------------------------------------------------------------------------------------------------------------------------------------------------------------------------------------------------------------------------------------------------------------------------------------------------------------------------------------------------------------------------------------------------------------------------------------------------------------------------------------------------------------------------------------------------------------------------------------------------------------------------------------------------------------------|
| Laboratory animals      | <p>The mice used in this study were as follows;</p> <p>NOG mice (In-Vivo Science)</p> <p>NOG/hIL-3/hGM-CSF Tg mice (In-Vivo Science)</p> <p>NOG-W41/hIL-3/hGM-CSF Tg mice (Central Institute for Experimental Animals, Kanagawa, Japan)</p> <p>C57BL/6J (Ly5.1) mice (Sakyo Lab Service)</p> <p>Topors knockout mice (Generated in this study). Topors+/- mice were generated in this study and were backcrossed to a C57BL/6J background for over five generations.</p> <p>All animal experiments were performed in accordance with the institutional guidelines for the use of laboratory animals and approved by the Review Board for Animal Experiments of the University of Tokyo (approval ID, PA18-42).</p> <p>Housing conditions: temperature <math>22 \pm 2^\circ\text{C}</math>, humidity <math>55 \pm 5\%</math>, light/dark cycle 12hour/12hour (8am-20pm light).</p> |
| Wild animals            | No wild animals were used in this study.                                                                                                                                                                                                                                                                                                                                                                                                                                                                                                                                                                                                                                                                                                                                                                                                                                          |
| Reporting on sex        | <p>NOG mice (In-Vivo Science): 10 weeks old, female</p> <p>NOG/hIL-3/hGM-CSF Tg mice (In-Vivo Science): 10 weeks old, male</p> <p>NOG-W41/hIL-3/hGM-CSF Tg mice (Central Institute for Experimental Animals, Kanagawa, Japan): 14 weeks old, female</p> <p>NOG/hIL-3/hGM-CSF Tg mice (In-Vivo Science): 10 weeks old, female</p> <p>C57BL/6J (Ly5.1) mice (Sakyo Lab Service): 10 weeks old, female</p> <p>Topors knockout mice (Generated in this study) : 2–4 months old, female (male only for the transformation experiment of GMPs by MLL-AF9)</p>                                                                                                                                                                                                                                                                                                                           |
| Field-collected samples | No Field-collected samples were used in this study.                                                                                                                                                                                                                                                                                                                                                                                                                                                                                                                                                                                                                                                                                                                                                                                                                               |
| Ethics oversight        | All experiments using mice were performed in accordance with our institutional guidelines for the use of laboratory animals and approved by the Review Board for Animal Experiments of IMSUT (approval ID: PS18–02).                                                                                                                                                                                                                                                                                                                                                                                                                                                                                                                                                                                                                                                              |

Note that full information on the approval of the study protocol must also be provided in the manuscript.

## Clinical data

Policy information about [clinical studies](#)

All manuscripts should comply with the ICMJE [guidelines for publication of clinical research](#) and a completed [CONSORT checklist](#) must be included with all submissions.

|                             |      |
|-----------------------------|------|
| Clinical trial registration | N.A. |
| Study protocol              | N.A. |
| Data collection             | N.A. |
| Outcomes                    | N.A. |

## Flow Cytometry

### Plots

Confirm that:

- The axis labels state the marker and fluorochrome used (e.g. CD4-FITC).
- The axis scales are clearly visible. Include numbers along axes only for bottom left plot of group (a 'group' is an analysis of identical markers).
- All plots are contour plots with outliers or pseudocolor plots.
- A numerical value for number of cells or percentage (with statistics) is provided.

## Methodology

Sample preparation

Cell lines were cultured as described in the method section. Mouse peripheral blood (PB) cells were collected from the orbital venous plexus using capillaries, and erythrocytes were lysed using erythrocyte lysis buffer (150 mM NH<sub>4</sub>Cl) before analysis. Bone marrow (BM) cells were extracted from the femur, tibia, and pelvis of euthanized mice. After erythrocyte lysis, BM cells were filtered through a 45 µm filter and centrifuged on a Histopaque-1119 (Sigma) to separate mononuclear cells.

Instrument

FACS Aria III (BD), FACS Celesta (BD)

Software

FlowJo v10

Cell population abundance

Cell sorting efficiency was confirmed by flow cytometric analysis of post-sorted cells.

Gating strategy

FSC/SSC were used for mononuclear and single cell gating. Live cells were gated by PI or DAPI negative. Lineage cells were defined as Mac-1- and/or Gr-1-positive for the myeloid lineage, CD19-positive for the B cell lineage, or CD3-positive for the T cell lineage. Hematopoietic stem and progenitor cells in BM were defined as lineage-negative, Sca-1-positive, c-Kit-positive for LSK, lineage-negative, Sca-1-negative, c-Kit-positive for myeloid progenitors, and among myeloid progenitors, CD34-positive and FcγRII/III-negative for common myeloid progenitors (CMPs), CD34-negative, FcγRII/III-negative for megakaryocyte-erythrocyte progenitors (MEPs), and CD34-positive, FcγRII/III-positive for granulocyte-macrophage progenitors (GMPs).

Tick this box to confirm that a figure exemplifying the gating strategy is provided in the Supplementary Information.
